# Supplementary material for: Bioadhesive Tannic-Acid-Functionalized Zein Coating Achieves Engineered Colonic Delivery of IBD Therapeutics via Reservoir Microdevices
Source: MDPI journal article supplement (doi:10.3390/pharmaceutics14112536), 2022-11-21
Supplement: s1 [file s1]

## Supporting Information

# Bioadhesive Tannic acid-functionalized Zein Coating Achieves State-of-the-Art, Colonic Delivery of IBD Therapeutics *via* Reservoir Microdevices

*Khorshid Kamguyan<sup>1</sup>, Rolf Bech Kjeldsen<sup>1</sup>, Saeed Zajforoushan Moghaddam<sup>2</sup>, Melanie Randahl Nielsen<sup>1</sup>, Esben Thormann<sup>2</sup>, Kinga Zór<sup>1</sup>, Line Hagner Nielsen<sup>1</sup>, Anja Boisen<sup>1,\*</sup>*

<sup>1</sup>Department of Health Technology, Technical University of Denmark, Ørsteds Pl., 2800

Kongens Lyngby, Denmark

<sup>2</sup>Department of Chemistry, Technical University of Denmark, Kemitorvet, 2800 Kongens

Lyngby, Denmark

## S1. Effect of zein coating thickness on the release profile of 5-ASA from MCs

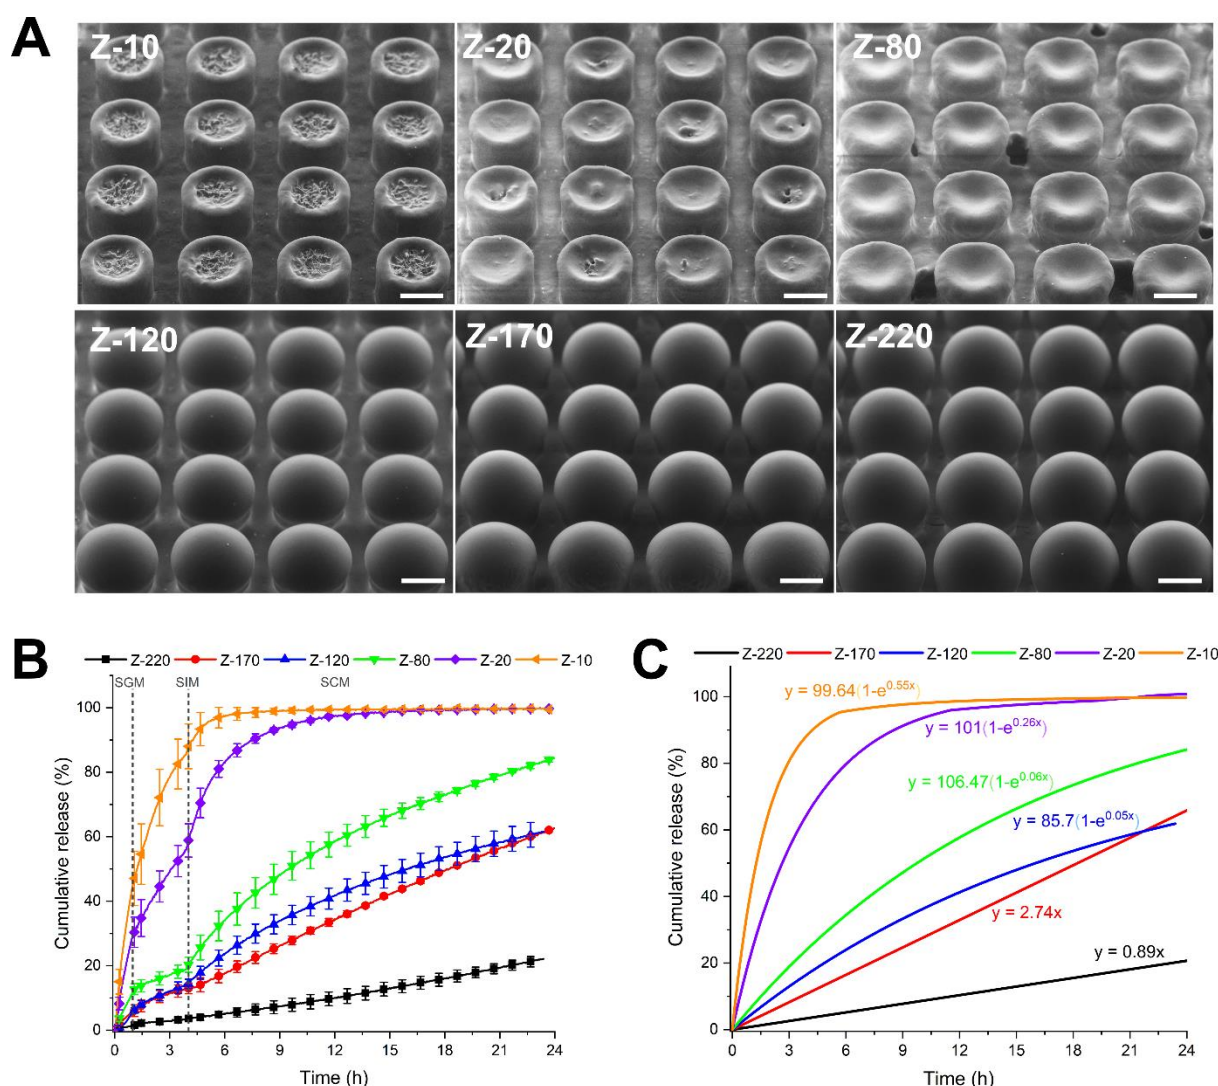

**Figure S1-** (A) SEM images of 5-ASA loaded MCs coated with Z-10, Z-20, Z-80, Z-120, Z-170 and Z-220 coatings. (B) Release of 5-ASA from MCs with different thicknesses in biorelevant media. (C) curve-fitting on the release profiles depicted in B. Scale bars represent 200  $\mu\text{m}$ . Data is presented as mean  $\pm$  SD and  $n=3$ .

**Figure S1-A** shows scanning electron microscopy (SEM) images of MCs loaded with 5-ASA and coated with different thicknesses of zein (10, 20, 80, 120, 170 and 220  $\mu\text{m}$ ). It is evident that 5-ASA is precisely packed into the MCs. However, it can be seen in the SEM images that Z-10 and Z-20 have not completely covered the loaded 5-ASA, leaving holes and imperfections in the coating. This is in contrast to Z-80 and thicker coatings, which have fully sealed the loaded drug.

Release of 5-ASA from the coated MCs was investigated in biorelevant media to study the effect of coating thickness on the drug release profiles (**Figure S1-B**). It is clear that by increasing the thickness of the coating, the rate of drug release significantly decreases from

97.42 $\pm$ 2.63 from Z-10 to 5.00 $\pm$ 1.40 released from Z-220 after 6 h. We can also observe in Figure 3-C that the rate of drug release is faster in gastric (pH=1.6) and colonic (pH=7.8) phases compared to the small intestinal phase (pH=6.5), which is in accordance with the swelling behavior observed in Figure 2. To better understand the differences in zein coatings with various thicknesses, a curve fitting was conducted on the release profiles (**Figure S1-C**). We can see that by increasing the thickness of the coating, the release kinetics change from a first-order release (for Z-10, Z-20, Z-80 and Z-120) to a zero-order release (for Z-170 and Z-220). The observed release kinetics suggest that 5-ASA is released through slow permeation of water through the zein membrane, dissolution of the drug inside the carrier and diffusion due to osmotic pressure.

## S2. Release of 5-ASA from EFS100 coated MCs

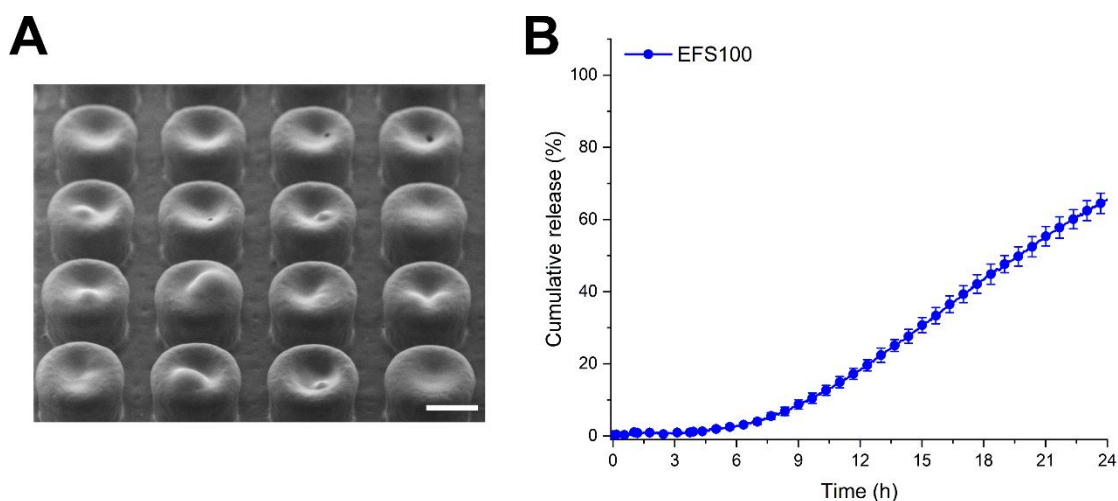

**Figure S2-** (A) SEM image of EFS100 coated MCs loaded with 5-ASA. (B) Release of 5-ASA from EFS100 coated MCs in simulated biorelevant media. Scale bars represent 200  $\mu$ m. Data is presented as mean  $\pm$  SD and n=3.

## S3. Release of 5-ASA from Pentasa<sup>®</sup>

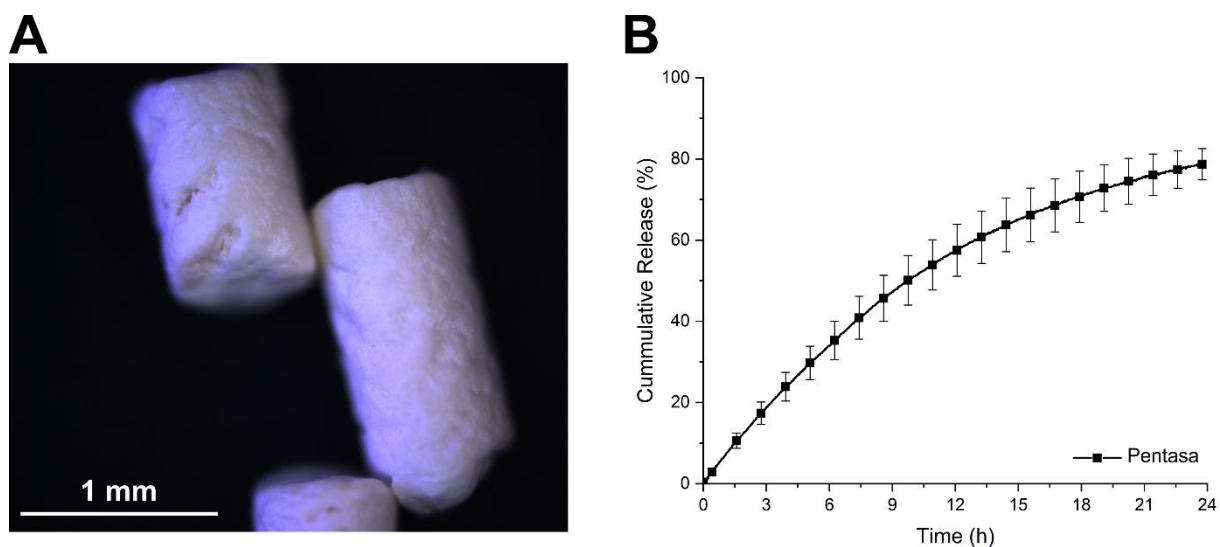

**Figure S3-** (A) optical microscopy image of Pentasa<sup>®</sup> granules. (B) *In vitro* release of 5-ASA from Pentasa<sup>®</sup> granules in PBS (pH = 7.4). Data is presented as mean  $\pm$  SD and n=3.

#### S4. Fasted state simulated biorelevant media for *in vitro* drug release

*SGM, pH = 1.6*

| Component         | Concentration (mM) |
|-------------------|--------------------|
| Taurocholate      | 0.08               |
| Phospholipids     | 0.02               |
| Sodium            | 34                 |
| Chloride          | 59                 |
| Hydrochloric acid | 25                 |

*SIM, pH = 6.5*

| Component    | Concentration (mM) |
|--------------|--------------------|
| Taurocholate | 3                  |

|                      |      |
|----------------------|------|
| <b>Phospholipids</b> | 0.75 |
| <b>Sodium</b>        | 148  |
| <b>Chloride</b>      | 106  |
| <b>Phosphate</b>     | 29   |
| <b>HEPES</b>         | 50   |

*SCM, pH = 7.8*

| <b>Component</b>        | <b>Concentration (mM)</b> |
|-------------------------|---------------------------|
| <b>Sodium cholate</b>   | 0.15                      |
| <b>Phospholipids</b>    | 0.3                       |
| <b>Oleate</b>           | 0.1                       |
| <b>Sodium hydroxide</b> | 120                       |
| <b>TRIS</b>             | 45                        |
| <b>Maleate</b>          | 76                        |
| <b>HEPES</b>            | 50                        |
